# Supplementary material for: Methanol maser associated outflows: detection statistics and properties
Source: Oxford University Press journal article supplement (doi:10.1093/mnras/stu1474), 2014-08-01
Supplement: 1020982_Supplementary_Data.zip [file 1020982_Supplementary_Data.zip]

Archive with 2 entries (2 files):
- AppendixA_MNRAS3.pdf
- AppendixB_MNRAS3.pdf
