# Supplementary material for: Methanol maser associated outflows: detection statistics and properties
Source: Oxford University Press journal article supplement (doi:10.1093/mnras/stu1474), 2014-08-01
Supplement: 1020982_Supplementary_Data.zip [file 1020982_Supplementary_Data.zip › AppendixA_MNRAS3.pdf]

## Appendix A

Background images are  $^{13}\text{CO}$  JCMT HARP intensity integrated images, integrated over the unique peak velocity range (listed in Table 2 of each source, for all observed targets with available  $\text{C}^{18}\text{O}$  maps.  $\text{C}^{18}\text{O}$  is contoured in multiples of integrated noise RMS,  $\phi$  (values in  $\text{K km s}^{-1}$  given in Table 1), with step-sizes usually  $2\phi$ , but indicated in brackets if a different step size is used. The lowest level contour is manually selected for each image, because every image has a unique signal-to-noise and background structure. These lowest level contours range between  $3\phi$  and  $14\phi$ .

The purple star shows the maser coordinate, while the green circle indicates the coordinate of peak intensity emission as detected by *ClumpFind*, described in §3.1.

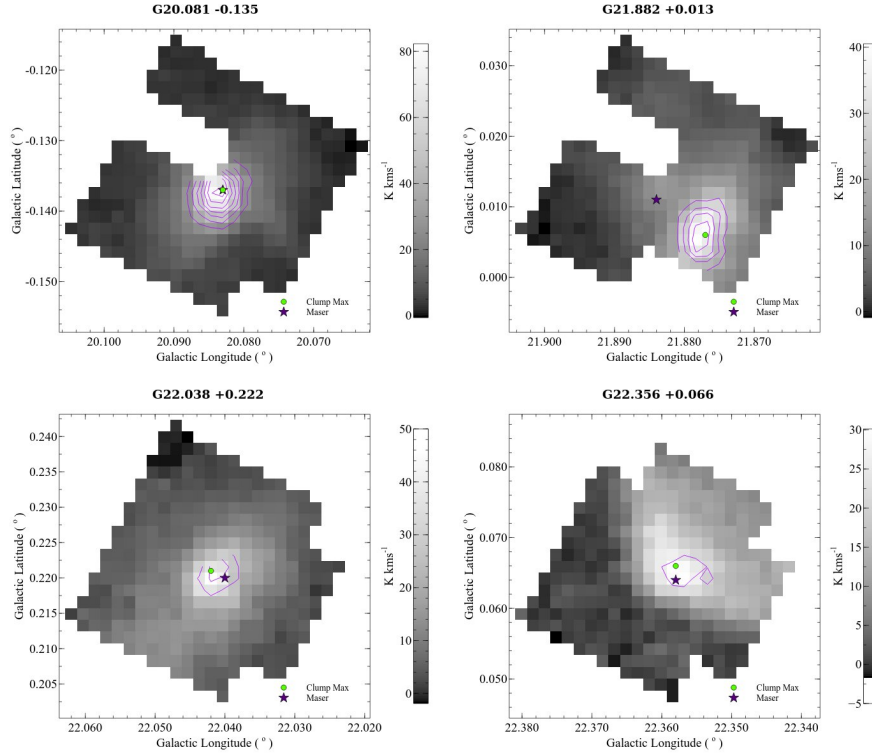

Figure A-1: Intensity integrated  $^{13}\text{CO}$  background with intensity integrated  $\text{C}^{18}\text{O}$  contoured in multiples in of the integrated noise RMS,  $\phi$  as given in Table 1, with step-sizes usually  $2\phi$ , but indicated in brackets if otherwise. Targets toward maser coordinates, indicated by the purple star, listed as rows of two from top to bottom: G 20.081-0.135 ( $4\phi$ ) and G 21.882+0.013; G 22.038+0.222 and G 22.356+0.066. The green circle indicates the coordinate of peak  $^{13}\text{CO}$  intensity emission.

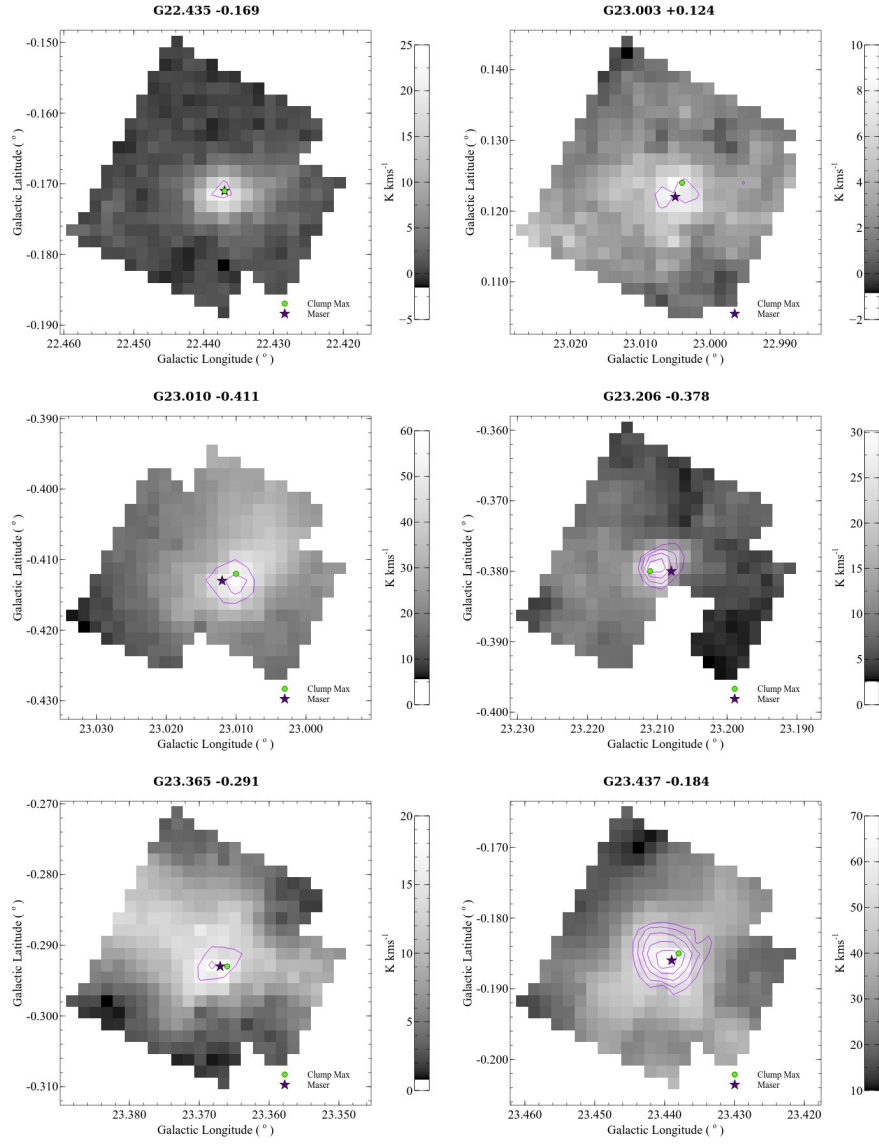

Figure A-1: – *continued* for rows of two from top to bottom: G 22.435-0.169 and G 23.003+0.124; G 23.010-0.411 and G 23.206-0.378; G 23.365-0.291 and G 23.437-0.184.

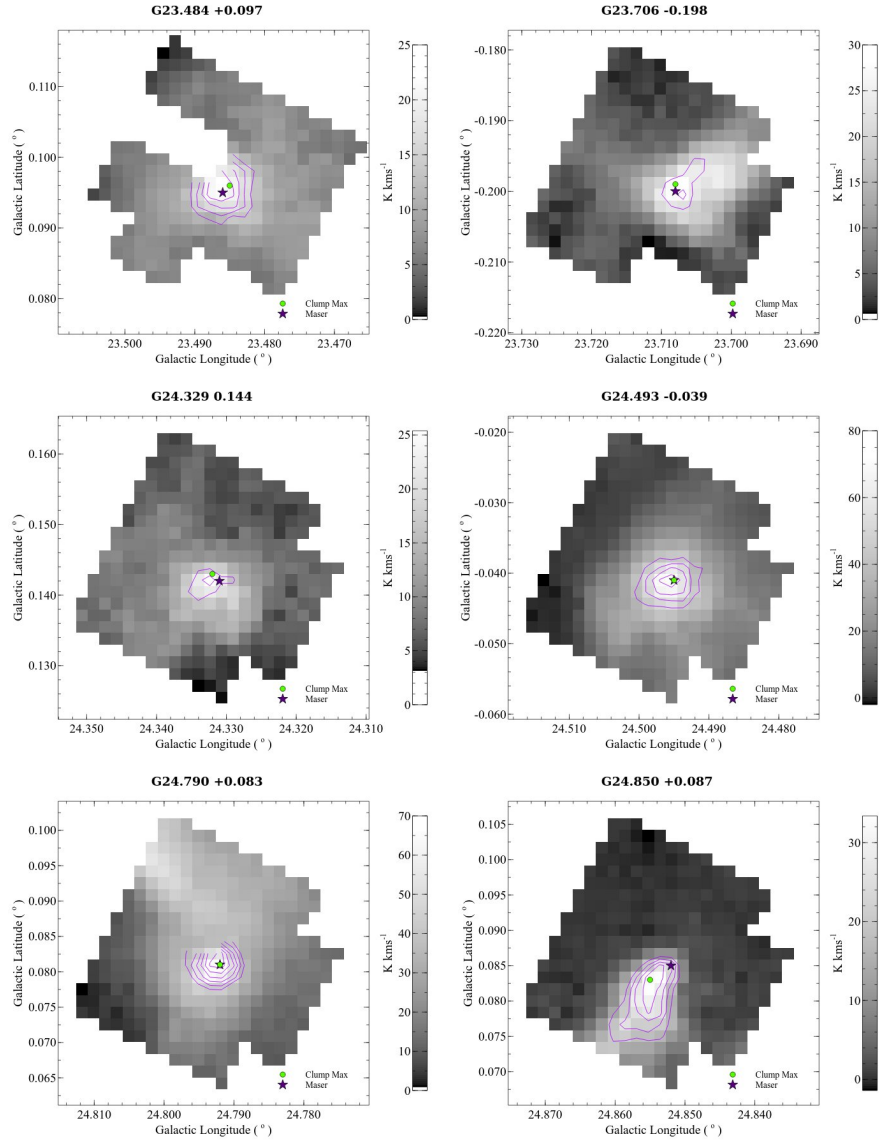

Figure A-1: – *continued* for rows of two from top to bottom: G 23.484+0.097 and G 23.706-0.198; G 24.329+0.144 and G 24.493-0.039; G 24.790+0.083A and G 24.850+0.087.

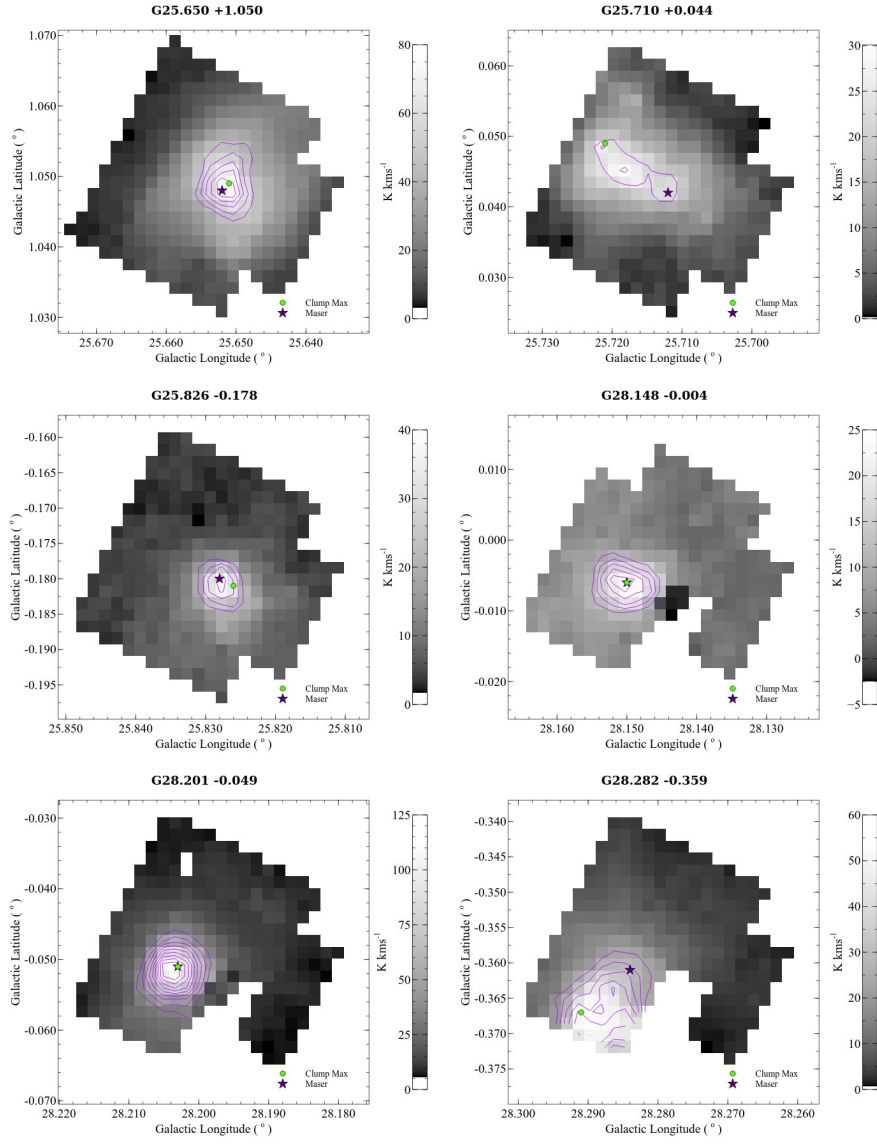

Figure A-1: – *continued* for rows of two from top to bottom: G 25.650+1.050 and G 25.710+0.044; G 25.826-0.178 and G 28.148+0.004; G 28.201-0.049 ( $4\phi$ ) and G 28.282-0.359 ( $4\phi$ ).

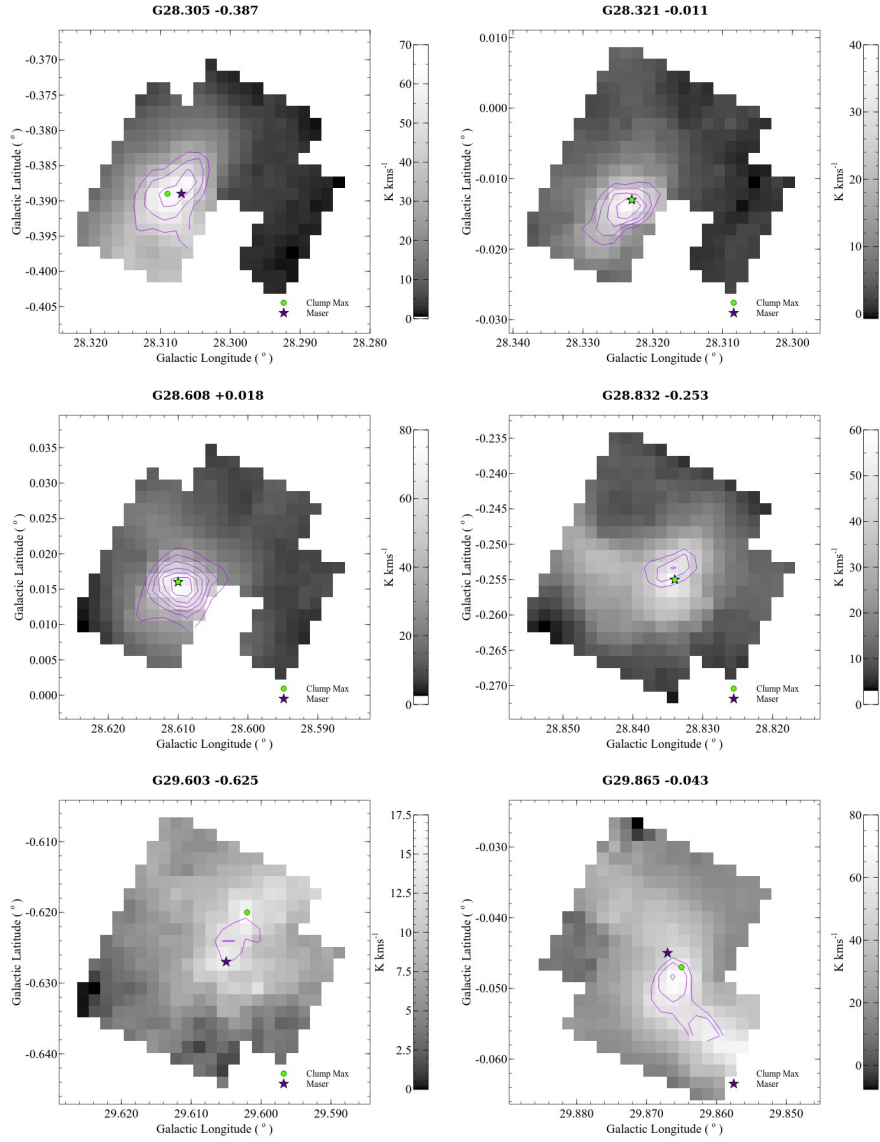

Figure A-1: – *continued* for rows of two from top to bottom: G 28.305-0.387 ( $4\phi$ ) and G 28.321-0.011; G 28.608+0.018 ( $4\phi$ ) and G 28.832-0.253; G 29.603-0.625 and G 29.865-0.043.

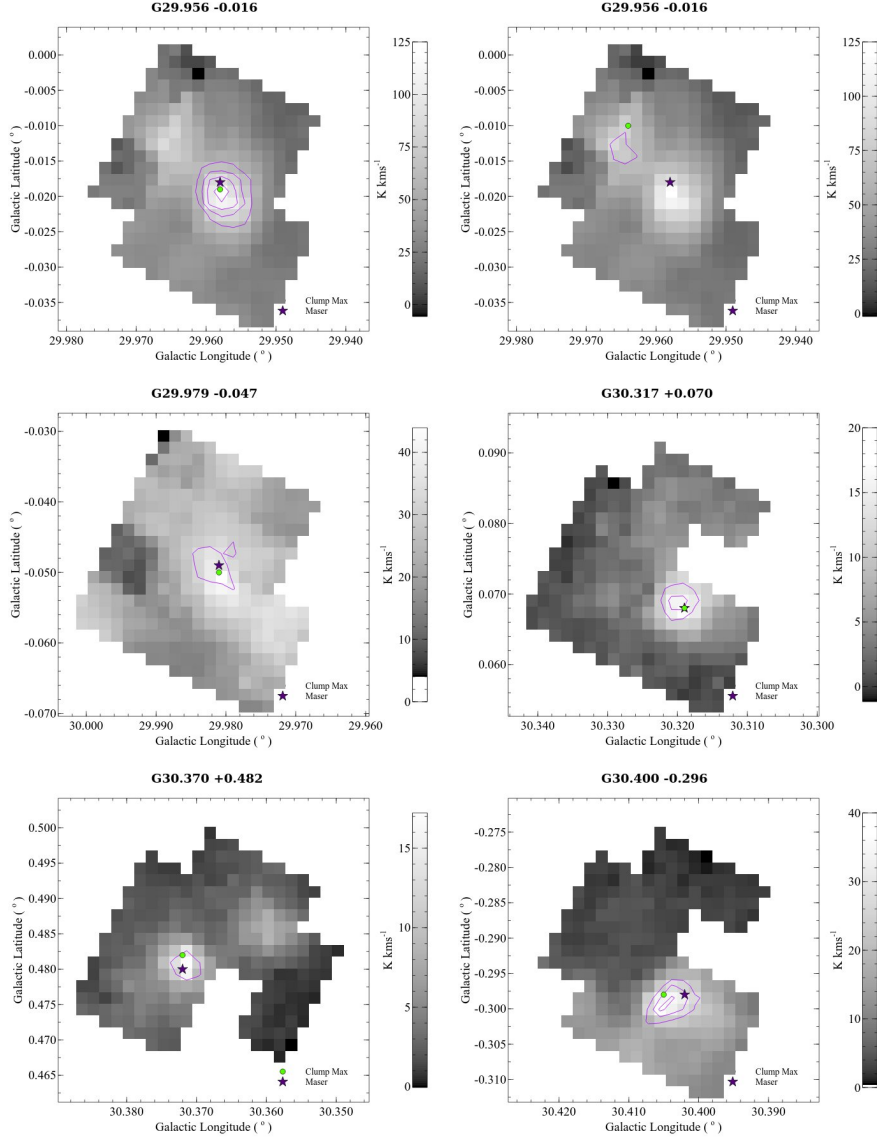

Figure A-1: *continued* for rows of two from top to bottom: G 29.956-0.016A ( $4\phi$ ) and G 29.956-0.016B ( $4\phi$ ); G 29.979-0.047 and G 30.317+0.070; G 30.370+0.482A and G 30.400-0.296.

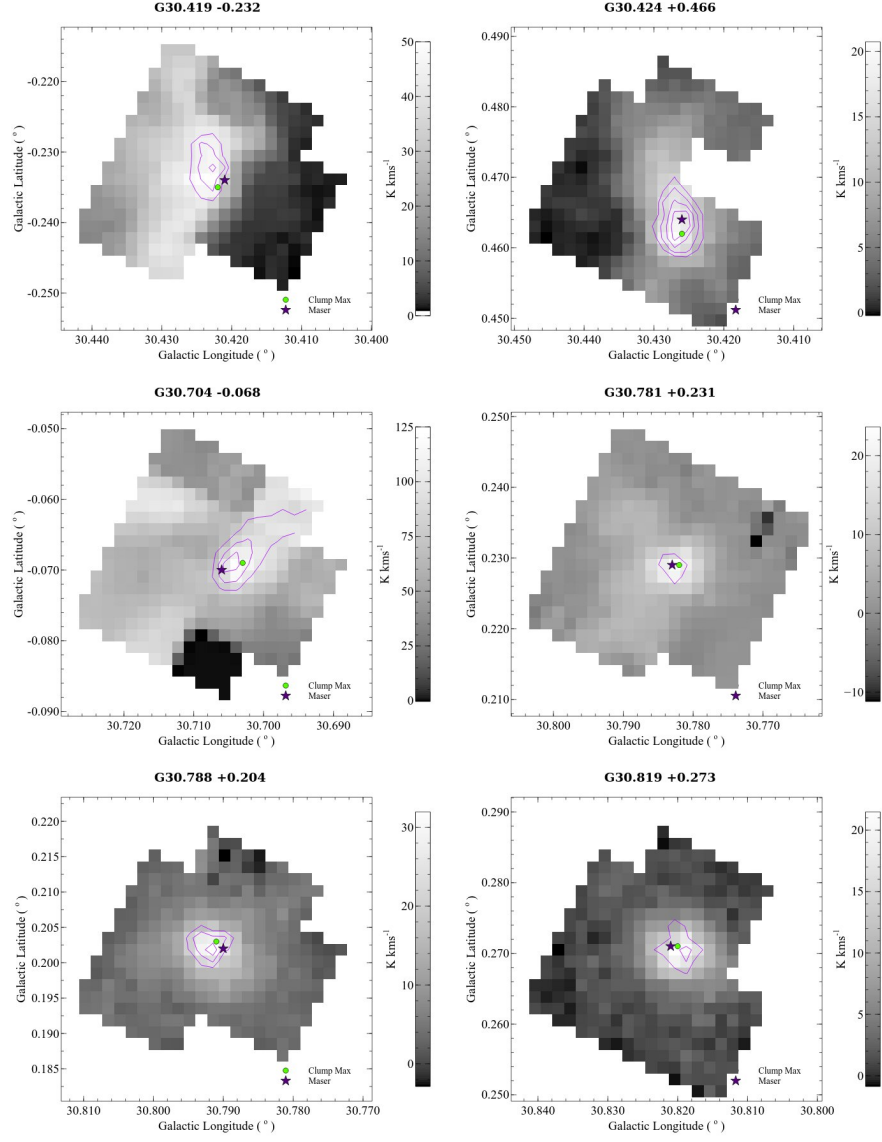

Figure A-1: – *continued* for rows of two from top to bottom: G 30.419-0.232 and G 30.424+0.466; G 30.704-0.068 (4 $\phi$ ) and G 30.781+0.231; G 30.788+0.204 and G 30.819+0.273.

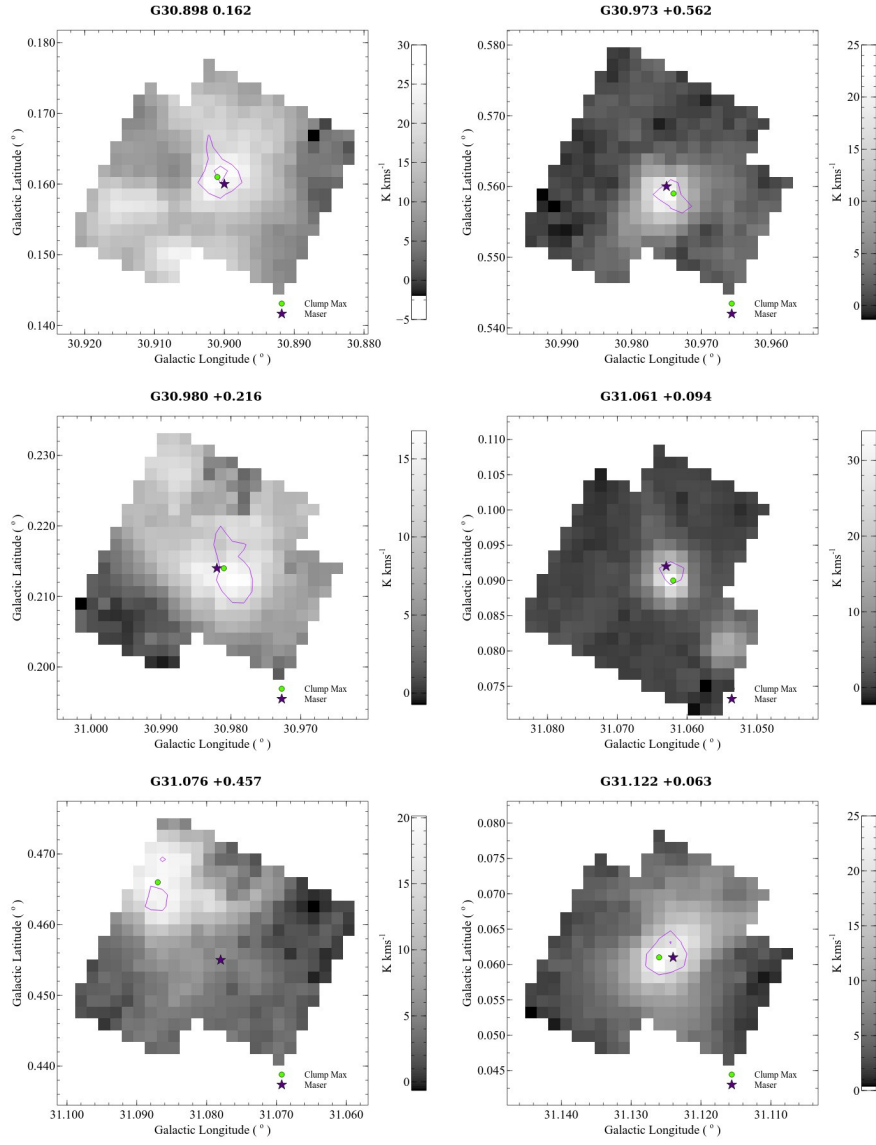

Figure A-1: – *continued* for rows of two from top to bottom: G 30.898+0.162 and G 30.973+0.562; G 30.980+0.216 and G 31.061+0.094; G 31.076+0.457 and G 31.122+0.063.

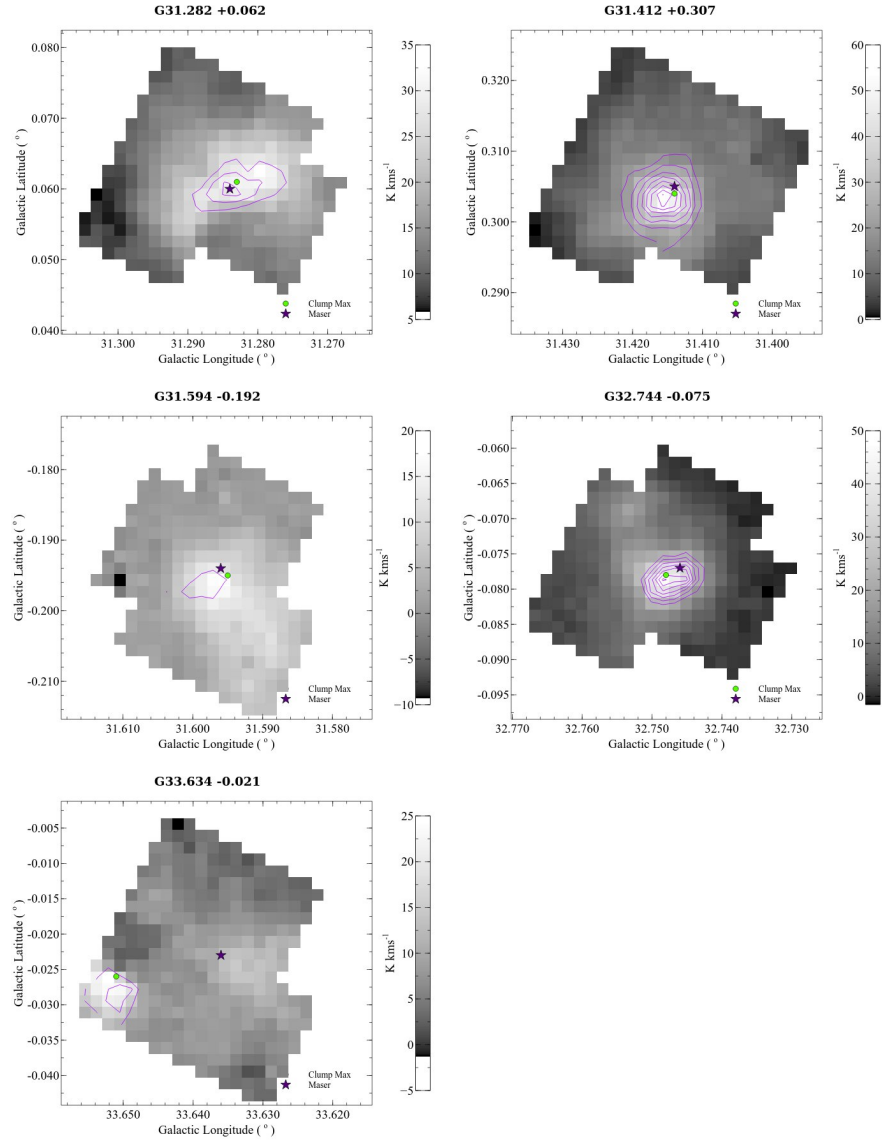

Figure A-1: – *continued* for rows of two from top to bottom: G 31.282-0.062 ( $4\phi$ ) and G 31.412+0.307 ( $4\phi$ ); G 31.594-0.192 and G 32.744-0.075; G 33.634-0.021.
