# Supplementary material for: Methanol maser associated outflows: detection statistics and properties
Source: Oxford University Press journal article supplement (doi:10.1093/mnras/stu1474), 2014-08-01
Supplement: 1020982_Supplementary_Data.zip [file 1020982_Supplementary_Data.zip › AppendixB_MNRAS3.pdf]

## Appendix B

Solid blue and dotted red contours indicate  $^{13}\text{CO}$  blue and red intensity integrated images over velocity ranges determined by the wing selection criteria as described in §3.2. Background images are integrated over the  $^{13}\text{CO}$  peak velocity range for each source (velocity ranges for each source are listed in Table 2).

Contours are plotted in 10% intervals up to 90% of the maximum intensity for each integrated image (values listed in Table 2). The lowest contour is never lower than 30%, but values could differ for each image depending on the individual background brightness levels. When source contamination in the velocity space cause other structures to be traced as well, the corresponding receptors are flagged as bad in the red and blue integrated images to prevent contour confusion.

The purple star shows the maser coordinate, while the green circle indicates the coordinate of peak intensity emission as detected by *ClumpFind*, described in §3.1.

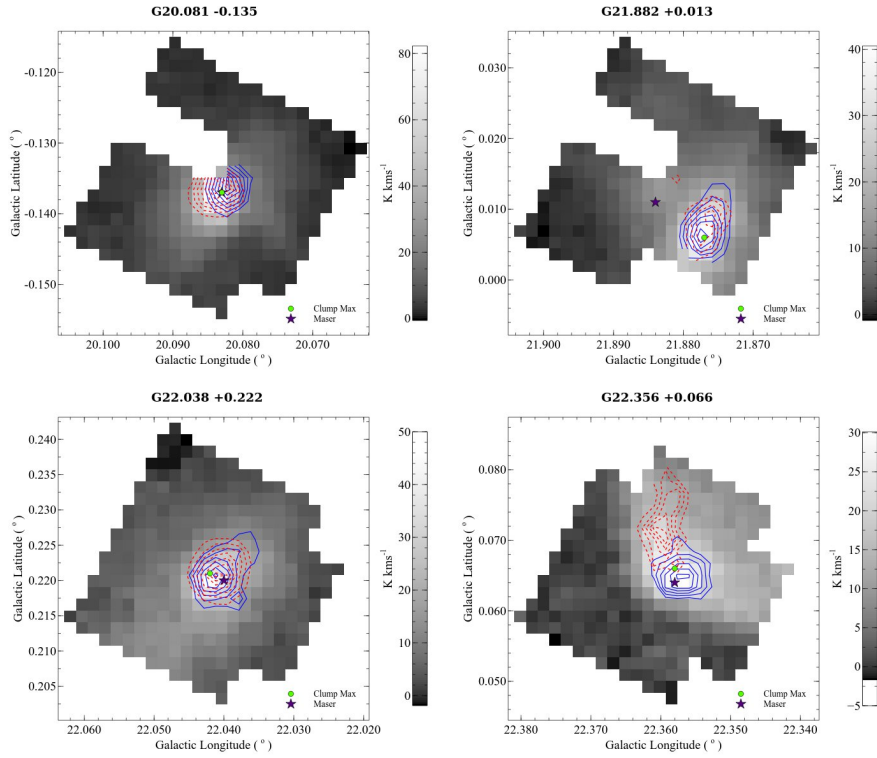

Figure B-1: Intensity integrated  $^{13}\text{CO}$  background, with blue and red  $^{13}\text{CO}$  intensity integrated outflow wings contoured in 10% intervals up to 90% of the maximum intensity of each map. The lowest contour is never lower than 30%, but could vary depending on the individual background brightness levels. Outflows are detected toward maser coordinates, indicated by the purple star, and listed as rows of two from top to bottom: G 20.081-0.135 and G 21.882+0.013; G 22.038+0.222 and G 22.356+0.060. The green circle indicates the coordinate of peak  $^{13}\text{CO}$  intensity emission.

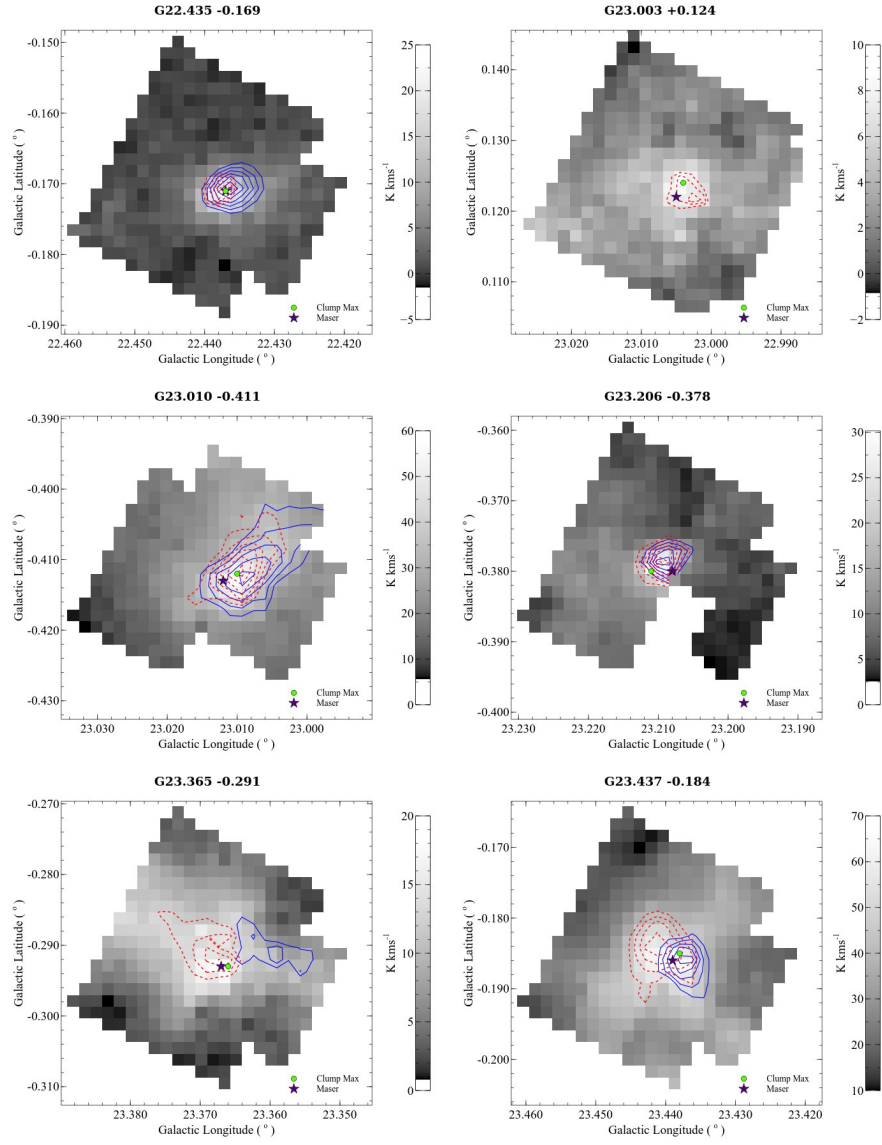

Figure B-1: – *continued* for rows of two from top to bottom: G 22.435-0.169 and G 23.003+0.124; G 23.010-0.411 and G 23.206-0.378; G 23.365-0.291 and G 23.437-0.184.

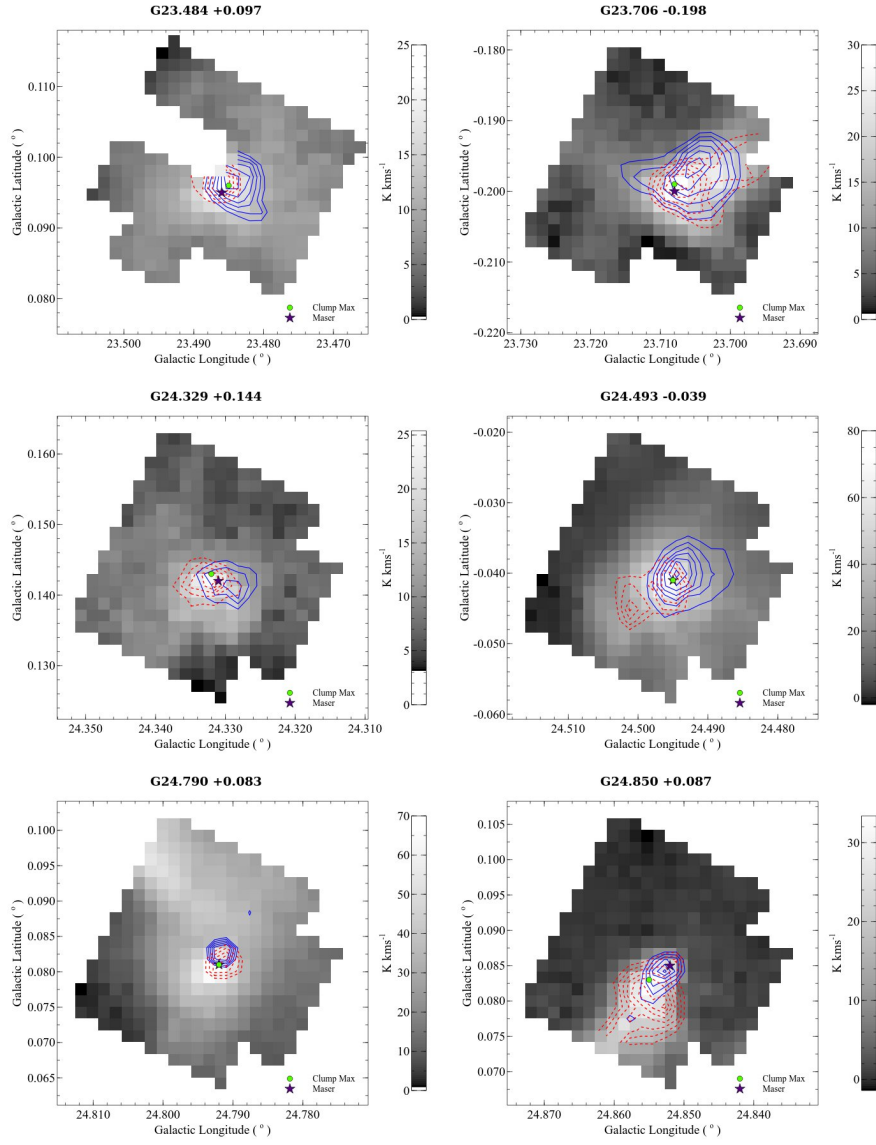

Figure B-1: – *continued* for rows of two from top to bottom: G 23.484+0.097 and G 23.706-0.198; G 24.329+0.144 and G 24.493-0.039; G 24.790+0.083 and G 24.850+0.087.

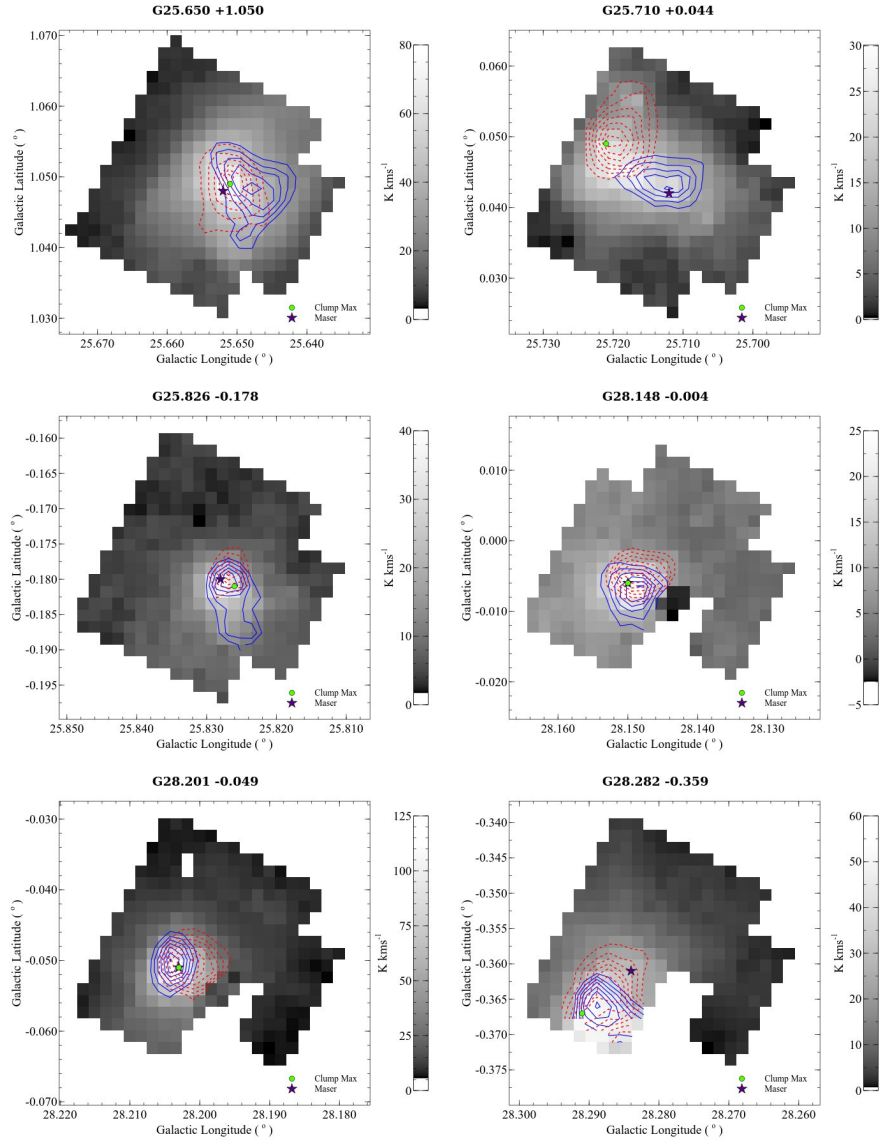

Figure B-1: – *continued* for rows of two from top to bottom: G 25.650+1.050 and G 25.710+0.044; G 25.826-0.178 and G 28.148+0.004; G 28.201-0.049 and G 28.282-0.359.

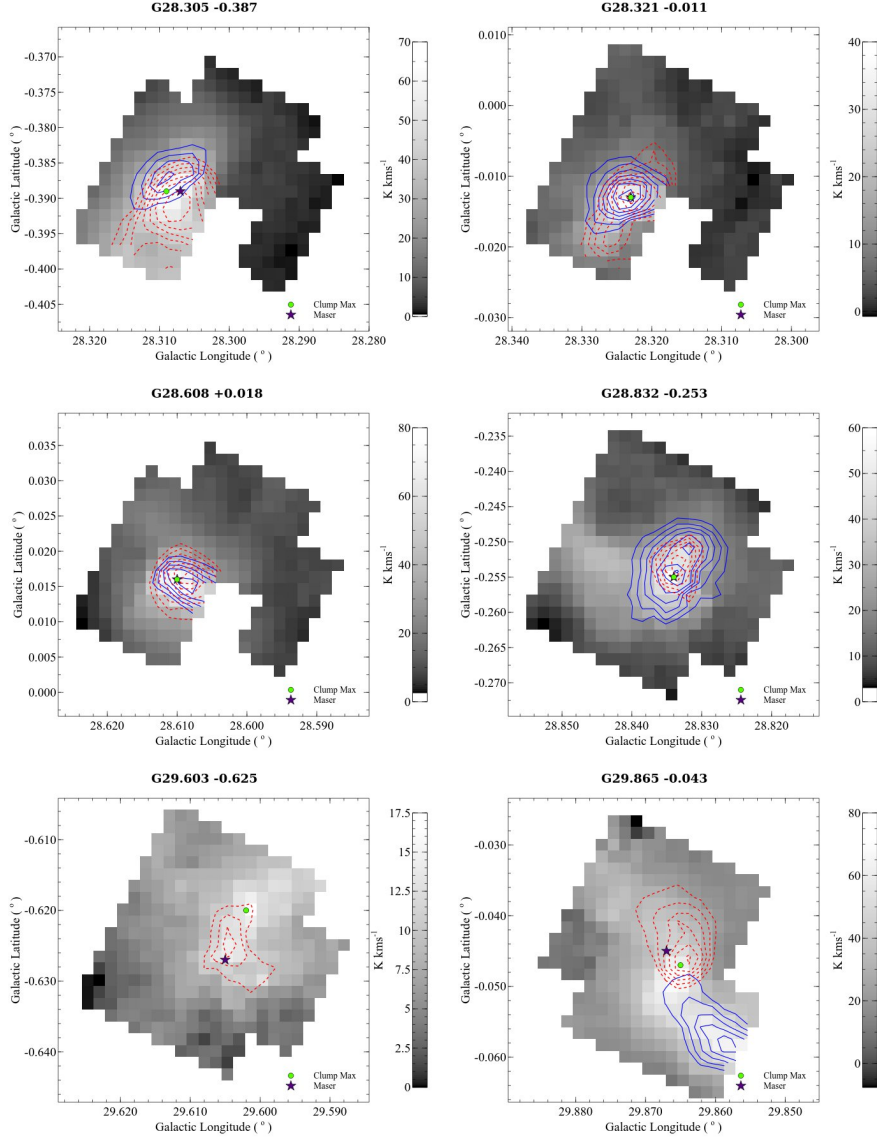

Figure B-1: – *continued* for rows of two from top to bottom: G 28.305-0.387 and G 28.321-0.011; G 28.608+0.018 and G 28.832-0.253; G 29.603-0.625 and G 29.865-0.043.

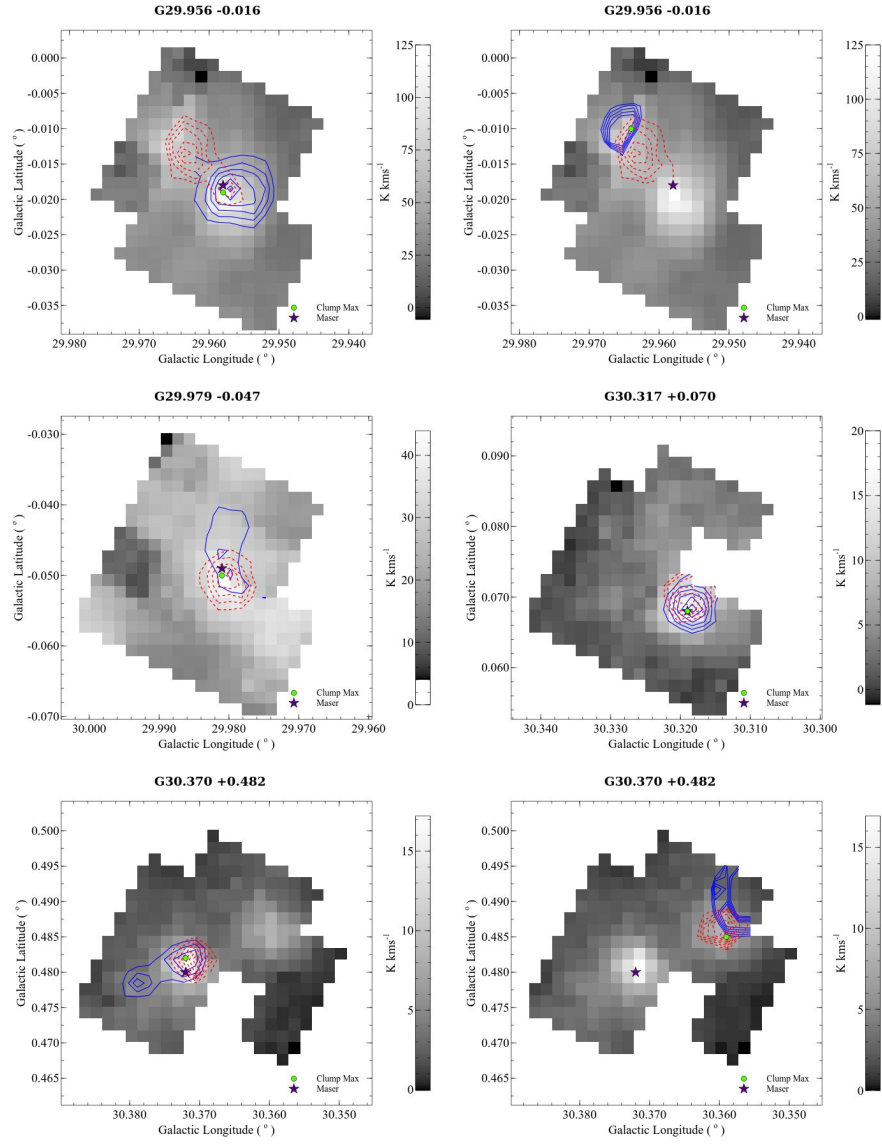

Figure B-1: – *continued* for rows of two from top to bottom: G 29.956-0.016A and G 29.956-0.016B; G 29.979-0.047 and G 30.317+0.070; G 30.370+0.482A and G 30.370+0.482B.

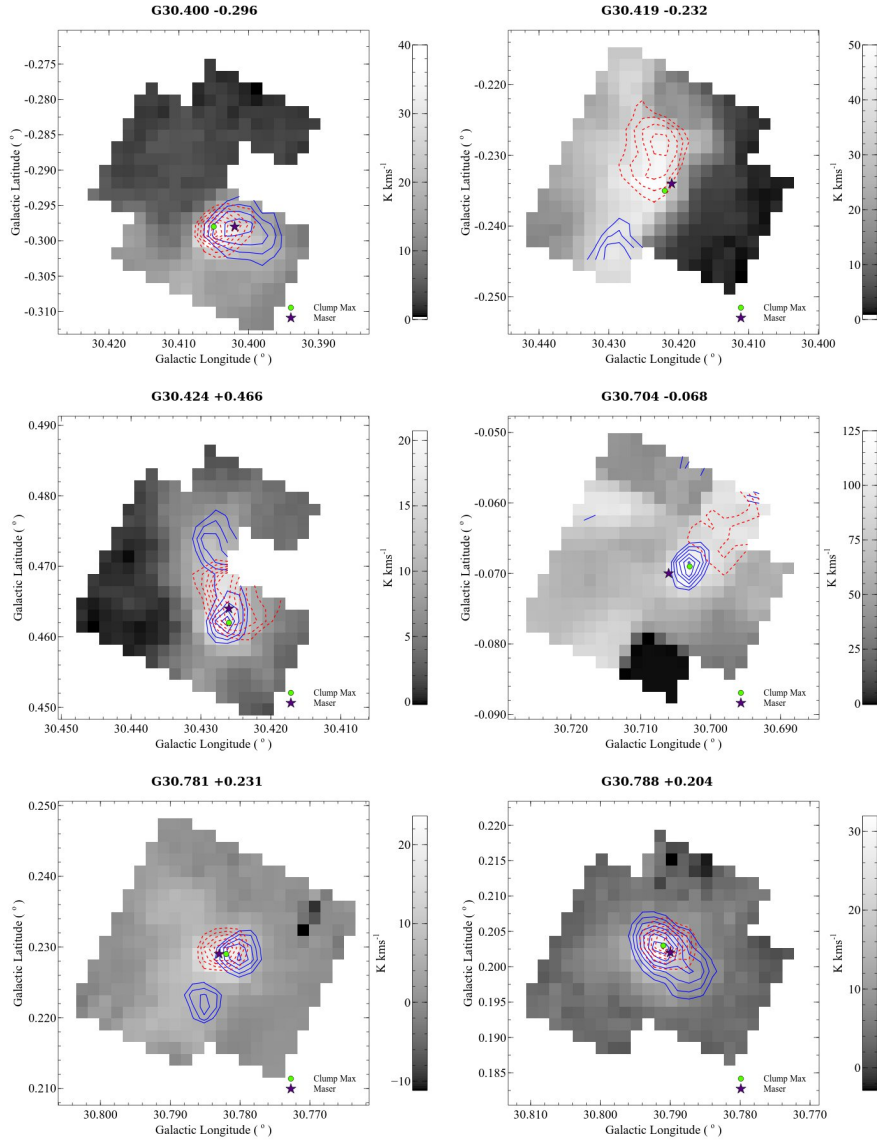

Figure B-1: – *continued* for rows of two from top to bottom: G 30.400-0.296 and G 30.419-0.232; G 30.424+0.466 and G 30.704-0.068; G 30.781+0.231 and G 30.788+0.204.

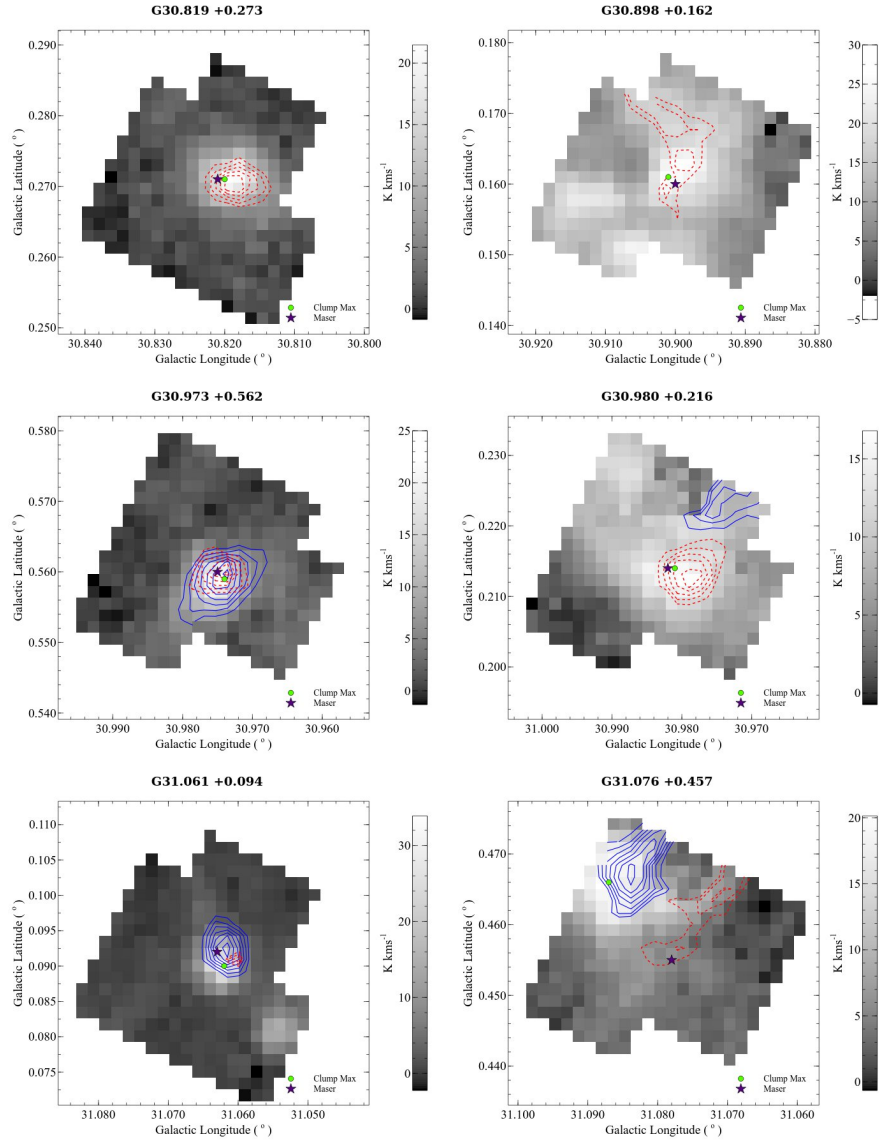

Figure B-1: – *continued* for rows of two from top to bottom: G 30.819+0.273 and G 30.898+0.162; G 30.973+0.562 and G 30.980+0.216; G 31.061+0.094 and G 31.076+0.457.

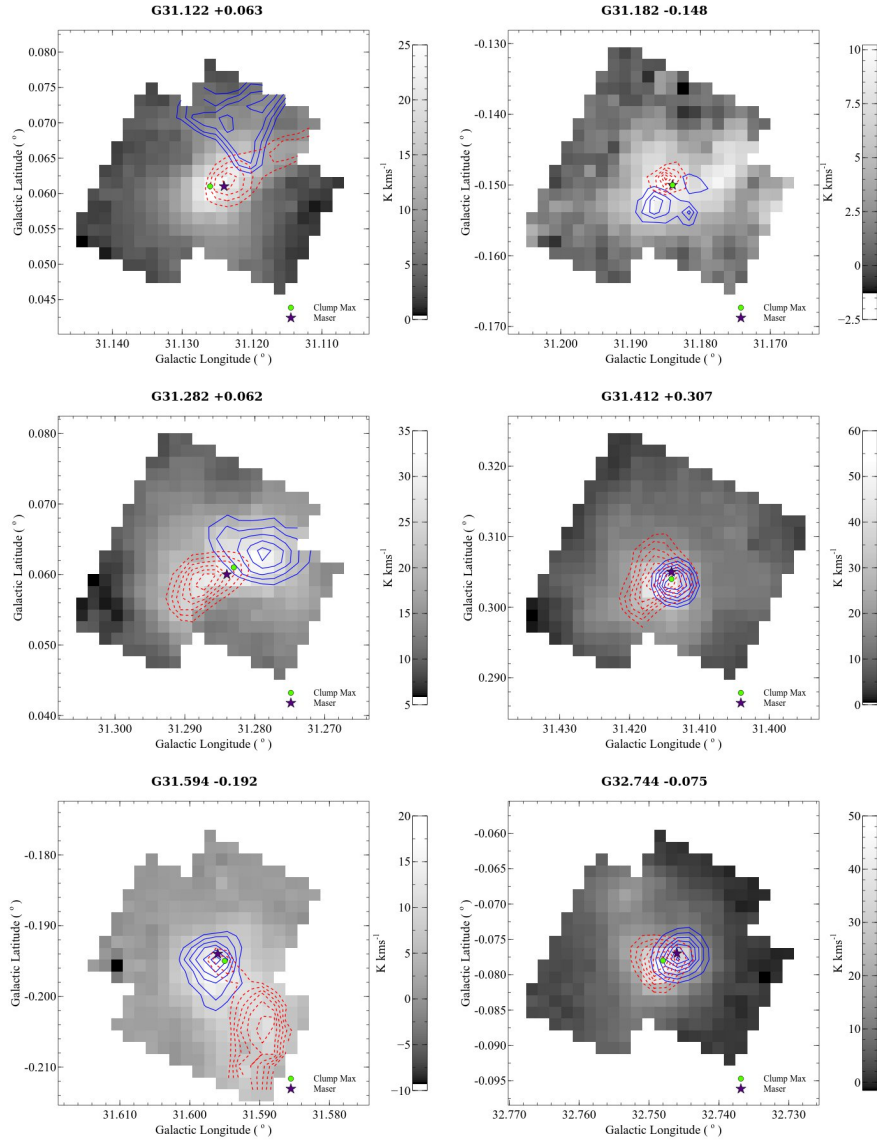

Figure B-1: – *continued* for rows of two from top to bottom: G 31.122+0.063 and G 31.182-0.148; G 31.282+0.062 and G 31.412+0.307; G 31.594-0.192 and G 32.744-0.075.

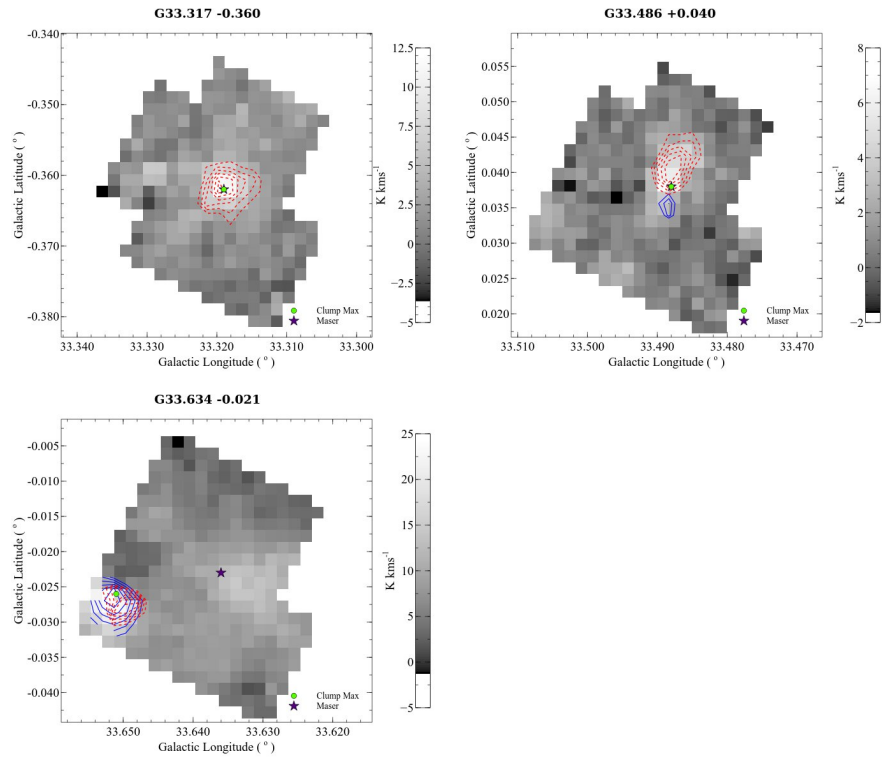

Figure B-1: – *continued* for rows of two from top to bottom: G 33.317-0.360 and G 33.486+0.040; G 33.634-0.021.
